# Supplementary material for: Comprehensive Analysis of Expression, Clinicopathological Association and Potential Prognostic Significance of RABs in Pancreatic Cancer
Source: MDPI journal article supplement (doi:10.3390/ijms21155580), 2020-08-04
Supplement: s1 [file s1]

## Supplementary information

# Comprehensive Analysis of Expression, Clinicopathological Association and Potential Prognostic Significance of RABs in Pancreatic Cancer

Shashi Anand <sup>1,2</sup>, Mohammad Aslam Khan <sup>1,2</sup>, Moh'd Khushman <sup>3</sup>, Santanu Dasgupta <sup>1,2</sup>, Seema Singh <sup>1,2,4</sup> and Ajay Pratap Singh <sup>1,2,4,\*</sup>

<sup>1</sup> Department of Pathology, College of Medicine, University of South Alabama, Mobile, AL 36617, USA; sanand@health.southalabama.edu (S.A.); makhan@health.southalabama.edu (M.A.K.); dasgupta@southalabama.edu (S.D.); seemasingh@health.southalabama.edu (S.S.)

<sup>2</sup> Cancer Biology Program, Mitchell Cancer Institute, University of South Alabama, Mobile, AL 36604, USA

<sup>3</sup> Department of Medical Oncology, Mitchell Cancer Institute, University of South Alabama, Mobile, AL 36604, USA; mmkhushman@health.southalabama.edu

<sup>4</sup> Department of Biochemistry and Molecular Biology, College of Medicine, University of South Alabama, Mobile, AL 36688, USA

\* Correspondence: asingh@health.southalabama.edu; Tel.: +1-251-445-9843; Fax: +1-251-460-6994

### Tumor stage-specific expression

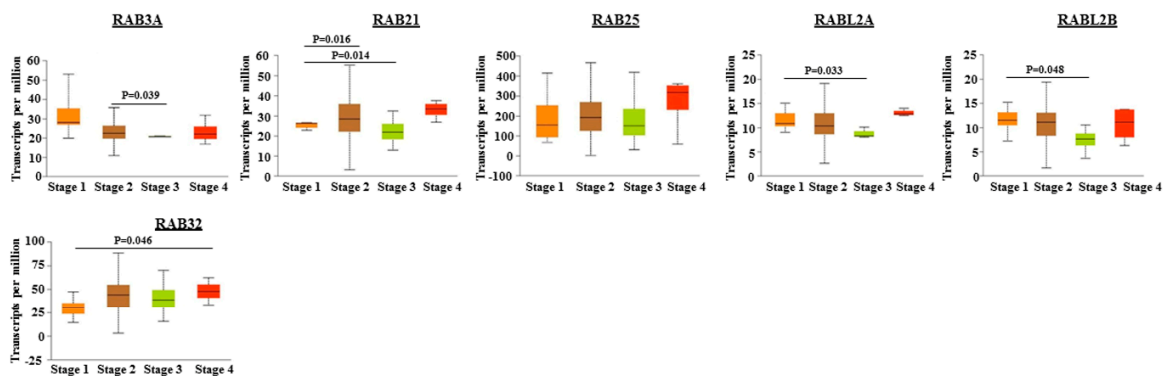

### Tumor grade-specific expression

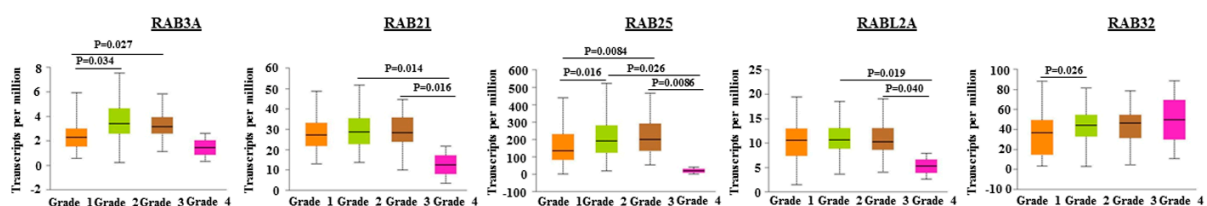

**Figure S1.** Association of transcript levels of *RAB3A*, *RAB21*, *RAB25*, *RABL2A*, *RABL2B* and *RAB32* with tumor grade and stage of pancreatic adenocarcinoma. Statistically significant tumor stage- and grade-specific association of some *RAB* genes was detected, but no clear pattern of association was evident. Stage 1 ( $n = 6$ ), stage 2 ( $n = 146$ ),

stage 3 ( $n = 4$ ) and stage 4 ( $n = 4$ ). Grade 1- well differentiated ( $n = 31$ ), grade 2-moderately differentiated ( $n = 95$ ), grade 3- poorly differentiated ( $n = 48$ ) and grade 4- undifferentiated ( $n = 2$ ).

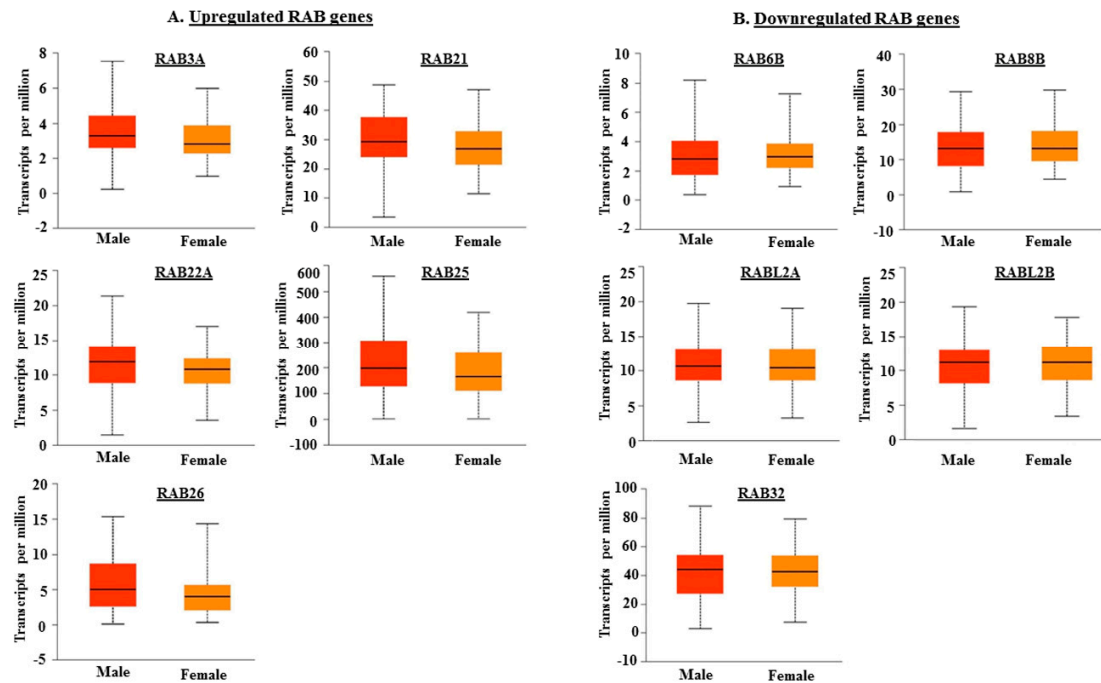

**Figure S2.** Gender-based differential expression of *RAB* genes. Transcript levels of (A) upregulated (*RAB3A*, *RAB21*, *RAB22A*, *RAB25* and *RAB26*) and (B) downregulated (*RAB6B*, *RAB8B*, *RABL2A*, *RABL2B* and *RAB32*) RABs in PDAC were examined for gender-specific differences. Male ( $n = 97$ ); Female ( $n = 80$ ). No significant association was observed.
